# Supplementary material for: Establishment and Verification On A Death Risk Model of Sepsis Patients Within 30 Days
Source: Research Square preprint supplement (doi:10.21203/rs.3.rs-980455/v1), 2021-10-22
Supplement: Supplementary file 1 [file b7a831d0a2b0203c51ef0087.docx]

| Variable | VIF |
| --- | --- |
| lac | 1.693 |
| ph | 1.627 |
| pro.bnp>20000(pg/ml) | 1.404 |
| cr201-300(mmol/L) | 1.278 |
| cr100-200(mmol/L) | 1.256 |
| albumin | 1.214 |
| plt<50(10*9/L) | 1.245 |
| pro.bnp2000-10000(pg/ml) | 1.247 |
| heart.rate | 1.218 |
| pt15-25(s) | 1.226 |
| pro.bnp10001-20000(pg/ml) | 1.241 |
| cr>400(mmol/L) | 1.261 |
| cr301-400(mmol/L) | 1.174 |
| Oxygenation.Index<150 | 1.182 |
| pt>25(s) | 1.164 |
| hct<0.30 | 1.185 |
| Oxygenation.Index150-300 | 1.143 |
| plt50-99(10*9/L) | 1.133 |
| map<70(mmhg) | 1.111 |
| plt>300(10*9/L) | 1.054 |
| hct>0.459 | 1.033 |
| map>105(mmhg) | 1.043 |
