# Supplementary material for: Establishment and Verification On A Death Risk Model of Sepsis Patients Within 30 Days
Source: Research Square preprint supplement (doi:10.21203/rs.3.rs-980455/v1), 2021-10-22
Supplement: Supplementary file 2 [file fa0808ca5832afc736500eb6.csv]

	gender	death	pt	aptt	k	cr	na	ca	pro.bnp	pct	crp	wbc	hct	plt	pao2	ph	fio2	lac	SBP	DBP	P	R	age	albumin	map	ox	Oxygenation.Index
2	female	0	15.39999962	57.09999847	3.329999924	162	147.3999939	1.960000038	709	100	200	12.82999992	0.314999998	82	117	7.402999878	33	1.100000024	160	90	112	24	85	28.10000038	113.333333333333	354.545454545455	354.545454545455
17	male	0	15.69999981	48.29999924	4.340000153	111	142	1.929999948	3032	1.289999962	200	4.909999847	0.223000005	251	151	7.422999859	33	1.399999976	122	72	129	32	81	21.39999962	88.6666666666667	457.575757575758	457.575757575758
20	female	0	14.19999981	42.90000153	3.25999999	81	140.1999969	2.079999924	1112	2.24000001	147.6999969	7.489999771	0.340000004	172	87.09999847	7.478000164	21	0.899999976	128	71	92	20	83	31.20000076	90	414.761897476191	414.761897476191
22	male	0	15	41.59999847	4.440000057	114	141.8000031	2.089999914	2108	47.45999908	172.7700043	6.239999771	0.300999999	74	157	7.451000214	33	1.399999976	109	66	116	20	78	29.89999962	80.3333333333333	475.757575757576	475.757575757576
29	male	0	14.10000038	35.59999847	4.150000095	175	137.1999969	2.019999981	907.2000122	0.169	105.1999969	13.07999992	0.32100001	168	60.5	7.396999836	37	5.199999809	119	69	121	30	89	34.20000076	85.6666666666667	163.513513513514	163.513513513514
35	male	1	13.60000038	39.5	3.730000019	88	143	2.25	11620.20001	7.849999905	224.1300049	17.38999939	0.441000015	255	60.90000153	7.342999935	29	10.8	140	72	120	26	57	31.70000076	94.6666666666667	210.000005275862	210.000005275862
39	female	0	15.19999981	37.20000076	4.159999847	172	144.3000031	1.909999967	2720	72.33999634	120	8.989999771	0.270999998	156	109	7.395999908	29	2.099999905	107	52	97	28	85	32.79999924	70.3333333333333	375.862068965517	375.862068965517
43	female	0	14	40	4.690000057	80	139.5	2.200000048	270.3999939	24.67000008	55.27999878	7.130000114	0.361000001	158	111	7.445000172	33	1.200000048	136	76	133	22	79	36.09999847	96	336.363636363636	336.363636363636
45	female	0	16.10000038	49	4.159999847	119	142.1999969	1.919999957	2673	41.38999939	186.5	13.68999958	0.307999998	155	141	7.400000095	33	2	142	78	108	28	87	24.89999962	99.3333333333333	427.272727272727	427.272727272727
55	male	1	17.79999924	52.79999924	3.849999905	108	139.5	1.75999999	14955	3.5	200	37.97999954	0.287	55	84.09999847	7.43900013	33	11.20000005	113	71	137	26	82	22.79999924	85	254.848480212121	254.848480212121
60	female	0	16.10000038	58.79999924	3.190000057	177	139.6000061	1.799999952	1820	11.14000034	200	12.36999989	0.368000001	129	50.29999924	7.402999878	21	2.5	166	73	123	24	88	27.29999924	104	239.523805904762	239.523805904762
63	male	0	20.20000076	49.20000076	3.180000067	115	156.8999939	1.830000043	1449	12.17000008	110.3000031	6.079999924	0.324999988	175	88.09999847	7.368999958	33	5.300000191	140	88	124	30	81	28.60000038	105.333333333333	266.969692333333	266.969692333333
71	female	1	14.5	42.5	4.329999924	81	143.1000061	1.730000019	19083	4.099999905	200	9.210000038	0.25	107	53	7.157999992	100	3.299999952	112	77	148	30	27	28.20000076	88.6666666666667	53	53
77	male	0	16	39.40000153	3.75999999	100	142.8000031	2.140000105	73.80000305	2.059999943	116.5999985	14.19999981	0.388999999	266	71.80000305	7.438000202	21	1.5	95	51	106	20	50	37.5	65.6666666666667	341.904776428571	341.904776428571
87	male	0	21.29999924	51.70000076	4.940000057	194	139.3000031	1.700000048	1847	100	211.3000031	9	0.254000008	159	117	7.297999859	37	5.5	164	64	111	25	87	20.39999962	97.3333333333333	316.216216216216	316.216216216216
93	male	0	13.30000019	46.40000153	3.779999971	75	142.8000031	2.24000001	122	0.143999994	44	6.809999943	0.386999995	305	110	7.38	33	1.3	124	79	100	20	87	23.4	94	333.333333333333	333.333333333333
97	male	0	13.89999962	43.59999847	3.779999971	226	148.6999969	2	35000	100	200	19.04999924	0.319999993	22	103	7.389999866	21	4.599999905	150	88	163	48	71	30.89999962	108.666666666667	490.47619047619	490.47619047619
98	male	0	15.10000038	48.70000076	4.429999828	99	145.1000061	1.960000038	14992	9.4	200	6.230000019	0.298000008	119	113	6.997000217	35	7.599999905	172	88	146	117	59	26.29999924	116	322.857142857143	322.857142857143
100	female	1	15.19999981	58.09999847	3.839999914	101	136	2.00999999	2876	30.05	200	4.829999924	0.301999986	51	56	7.361999989	21	5.800000012	116	75	101	28	46	28.39999962	88.6666666666667	266.666666666667	266.666666666667
101	male	0	15.10000038	49.59999847	3.680000067	137	141.6000061	2.089999914	4721	15.93000031	56.86999893	14.13000011	0.421000004	81	87.09999847	7.388000011	29	3.799999952	159	86	139	30	87	29.5	110.333333333333	300.344822310345	300.344822310345
102	male	1	15.30000019	55.90000153	3.579999924	119	151.6000061	2.079999924	6992	14.93000031	200	17.26000023	0.259000003	247	71.69999695	7.452000141	33	12	113	68	150	46	71	26.5	83	217.272718030303	217.272718030303
106	female	0	13	35.40000153	4.070000172	53	137.6000061	1.779999971	724	4.659999847	80	2.460000038	0.259000003	92	181	7.340000153	33	1.600000024	95	52	99	22	27	33.20000076	66.3333333333333	548.484848484848	548.484848484848
118	female	0	13.39999962	30.79999924	5.699999809	146	144	2.029999971	2794	25.70000076	176.5	11.48999977	0.330000013	160	125	7.316999912	33	2.400000095	105	52	101	28	87	31.60000038	69.6666666666667	378.787878787879	378.787878787879
120	male	0	16.39999962	52	3.720000029	220	145.1999969	2.059999943	8264	100	155.6999969	16.11000061	0.374000013	42	82.80000305	7.359000206	21	4	101	59	123	28	84	29.89999962	73	394.285728809524	394.285728809524
121	male	1	16.10000038	56.29999924	4.579999924	340	152	1.970000029	2082	14.86999989	151.8000031	13.07999992	0.344999999	66	124	7.237999916	50	5.400000095	118	53	149	30	84	26	74.6666666666667	248	248
126	male	1	17.39999962	44	4.300000191	123	139	1.940000057	722.4	3.069999933	187.3000031	12.89999962	0.39199999	78	93.5	7.285999775	41	2.299999952	147	84	210	92	87	26.3	105	228.048780487805	228.048780487805
134	female	0	24.20000076	63	3.599999905	94	138.6000061	1.909999967	3235	71.63999939	200	9.380000114	0.272000015	105	118	7.373000145	29	6.900000095	113	73	82	30	39	30.10000038	86.3333333333333	406.896551724138	406.896551724138
141	male	1	13.60000038	40.70000076	3.720000029	144	157.8999939	2.019999981	20000	100	64.16000366	6.449999809	0.277999997	56	94	7.262999916	50	12.79999995	75	40	129	32	77	26.5	51.6666666666667	188	188
143	male	0	15.30000019	38.90000153	4.110000134	225	141.5	1.870000005	1925	80.26000214	232.1399994	11.43000031	0.337000012	173	72	7.214000225	60	4.099999905	143	62	126	26	82	26.39999962	89	120	120
147	male	0	23.10000038	46.79999924	4.320000172	161	138.6999969	2.089999914	13000	100	219.1999969	14.18000031	0.307000011	56	70.09999847	7.446000099	29	5.900000095	97	56	132	34	62	33.29999924	69.6666666666667	241.724132655172	241.724132655172
150	male	0	17.10000038	50.29999924	4.730000019	276	164.1000061	1.690000057	219.8999939	45.52	43.33000183	11.60000038	0.384000003	65	96.40000153	7.296999931	55	10.89999962	106	59	132	48	57	28.20000076	74.6666666666667	175.272730054545	175.272730054545
151	female	1	15.80000019	55.29999924	5.03000021	181	136.3999939	2.00999999	28174	27.04000092	208.8000031	7.980000019	0.360000014	118	180	7.381999969	33	3	109	58	180	24	84	23.29999924	75	545.454545454545	545.454545454545
155	female	0	20.60000038	50.59999847	3.920000076	71	143.3000031	2.089999914	3261	7.789999962	261.2099915	12.89000034	0.202999994	220	55.90000153	7.43200016	29	1.799999952	136	81	120	26	48	29.29999924	99.3333333333333	192.758625965517	192.758625965517
157	male	0	16.29999924	49	3.819999933	81	140.6000061	2.109999895	1053	28.18000031	200.3999939	5.679999828	0.361999989	77	76.30000305	7.434999943	21	2.5	106	58	150	36	81	29.20000076	74	363.333347857143	363.333347857143
159	female	0	19.60000038	52.79999924	3.74000001	173	145.8000031	1.830000043	7382	100	200	10.38000011	0.241999999	11	192	7.230000019	50	8.699999809	118	69	188	34	59	26.39999962	85.3333333333333	384	384
160	female	0	16.20000076	45.5	4.190000057	146	136	1.940000057	4131	0.465999991	23.89999962	15.72000027	0.360000014	126	61.5	7.313000202	60	3	111	85	126	40	92	22.89999962	93.6666666666667	102.5	102.5
162	male	0	13.30000019	46.70000076	4.28000021	461	147.3000031	2.130000114	1412	36.59999847	145.3000031	7.119999886	0.257999986	210	97.90000153	7.438000202	33	1.200000048	124	76	100	121	81	29.70000076	92	296.66667130303	296.66667130303
163	female	0	17.60000038	53.79999924	3.200000048	139	136.8000031	1.769999981	6112	82.55000305	180.1000061	10.71000004	0.282000005	63	137	7.379000187	33	2.599999905	167	79	118	210	44	33.59999847	108.333333333333	415.151515151515	415.151515151515
171	female	0	14.69999981	55.20000076	3.950000048	60	140.1999969	1.799999952	2262	2.99000001	35.09999847	12.06999969	0.244000003	48	123	7.260000229	45	4.5	115	64	146	40	73	26.20000076	81	273.333333333333	273.333333333333
177	female	0	17.10000038	43.70000076	3.25999999	83	139.6000061	2.059999943	1126	6.53000021	148.9400024	7.309999943	0.335000008	29	101	7.500999928	33	2.700000048	132	76	89	28	73	23.70000076	94.6666666666667	306.060606060606	306.060606060606
178	male	0	14.19999981	57.90000153	3.670000076	219	139.1000061	1.909999967	188	100	243.1000061	27.13999939	0.365999997	79	134	7.434000015	33	2	96	66	98	22	26	34	76	406.060606060606	406.060606060606
179	male	0	17.39999962	45.90000153	4.090000153	147	135.8000031	2.069999933	2760	44.88999939	62.68000031	6.25	0.379000008	91	63.59999847	7.440000057	41	4.300000191	112	50	125	32	84	24.10000038	70.6666666666667	155.121947487805	155.121947487805
183	male	0	16.10000038	42.59999847	3.599999905	151	145	2.109999895	8494	4.809999943	162.8999939	11.03999996	0.393000007	130	55.20000076	7.298999786	41	5.900000095	137	63	88	30	88	32.5	87.6666666666667	134.634148195122	134.634148195122
186	male	0	15.5	49.40000153	5.46999979	57	132	1.889999986	333	0.400999993	35.40000153	12.61999989	0.328999996	321	128	7.419000149	30	1.600000024	116	57	110	30	68	39.5	76.6666666666667	426.666666666667	426.666666666667
187	male	0	13.69999981	50.70000076	3.579999924	171	147.6999969	1.929999948	4503	71.26000214	91.87000275	13.06999969	0.298000008	265	106	7.350999832	29	1.799999952	113	75	89	30	79	29.29999924	87.6666666666667	365.51724137931	365.51724137931
191	male	0	14.39999962	40.09999847	3.660000086	70	137	2.00999999	5224	18.69000053	101.5999985	3.430000067	0.370999992	165	81.90000153	7.360000134	41	2.099999905	88	55	122	28	80	26.60000038	66	199.756101292683	199.756101292683
194	female	0	14.69999981	44	3.069999933	111	138.5	1.860000014	1696	53.38999939	131.5	8.210000038	0.305999994	162	100	7.427999973	33	2.299999952	141	83	102	22	78	29.39999962	102.333333333333	303.030303030303	303.030303030303
197	female	1	16.39999962	42.09999847	3.50999999	192	133.8000031	1.779999971	4009	11.13000011	200	7.409999847	0.270000011	85	83.80000305	7.409999847	33	3.5	99	52	94	21	82	18	67.6666666666667	253.939403181818	253.939403181818
199	male	1	14.10000038	47.09999847	5.309999943	264	139.6999969	1.879999995	25000	10.2	138.3699951	7.690000057	0.298000008	149	123	7.335000038	45	5.900000095	113	79	120	27	80	20.10000038	90.3333333333333	273.333333333333	273.333333333333
206	male	1	14	36.59999847	3.829999924	43	135.1000061	2.049999952	10000	7.139999866	172.8999939	19.70999908	0.291999996	384	81.80000305	7.493000031	33	10.89999998	108	72	108	22	52	29.29999924	84	247.878797121212	247.878797121212
209	male	1	13.39999962	50.59999847	3.849999905	379	162.3000031	1.970000029	1803	32.47999954	200	10.89999962	0.263000011	109	85	7.414000034	41	7.099999905	107	45	174	42	88	21.70000076	65.6666666666667	207.317073170732	207.317073170732
213	male	0	16.39999962	41.5	3.950000048	138	143.1999969	1.799999952	2603	0.680999994	227.5	12.93999958	0.307000011	175	103	7.250999928	40	3.400000095	124	56	130	31	88	25.70000076	78.6666666666667	257.5	257.5
219	female	0	14.19999981	39.70000076	4.369999886	43	134.6000061	1.809999943	417.8999939	0.054000001	100.3399963	10.93999958	0.275999993	260	114	7.406000137	29	1.5	91	55	116	31	27	33.29999924	67	393.103448275862	393.103448275862
221	male	0	14	48.09999847	4.96999979	171	142.8000031	1.860000014	487.6000061	24.81999969	61.75999832	11.96000004	0.301999986	63	38	7.203999996	50	6.599999905	121	69	158	43	69	23.39999962	86.3333333333333	76	76
222	male	0	17.70000076	46.90000153	3.75999999	154	144.5	2.039999962	1124	10.32999992	140.3300018	11.57999992	0.404000014	124	80.69999695	7.409999847	21	4.300000191	151	86	102	94	55	31.20000076	107.666666666667	384.285699761905	384.285699761905
223	male	0	14.60000038	47.90000153	3.940000057	70	142.8000031	1.99000001	88.59999847	0.131999999	89.01999664	2.769999981	0.43599999	161	71.40000153	7.433000088	41	3.299999952	130	82	96	30	41	35.20000076	98	174.146345195122	174.146345195122
224	male	1	33	50.1	4.2	414	157	2.05	4562	28.8	50.13	12.10000038	0.214000002	18	78	7.152999878	100	18	42	24	142	26	76	32.9	30	78	78
228	female	0	14.80000019	43.70000076	4.489999771	150	144.1999969	2.200000048	3887	100	185.6999969	15.44999981	0.257999986	282	113	7.451000214	33	1.5	113	57	110	22	87	25.5	75.6666666666667	342.424242424242	342.424242424242
235	male	0	15.30000019	52.70000076	3.599999905	156	143.1000061	1.950000048	1840	26.68000031	184.5	5.170000076	0.328000009	168	130	7.493000031	33	1.399999976	116	62	90	26	65	31.70000076	80	393.939393939394	393.939393939394
236	male	0	37.09999847	90.40000153	2.940000057	326	140.8999939	2.00999999	16614	41.95999908	286.8900146	14.25	0.272000015	86	111	7.303999901	29	1.200000048	154	78	124	26	70	34	103.333333333333	382.758620689655	382.758620689655
237	male	1	13.8	45.4	3.4	64	134.6999969	2.18	702.7999878	32.1	90	9.2	0.266	140	78	7.571000099	33	6.099999905	85	39	159	34	87	31.9	54.3333333333333	236.363636363636	236.363636363636
241	male	0	20.5	51.70000076	3.599999905	92	145.8000031	2.109999895	760	62.50999832	165.6000061	19.45999908	0.361000001	89	95.09999847	7.335999966	33	5.300000191	138	79	119	42	64	33.40000153	98.6666666666667	288.181813545455	288.181813545455
246	male	0	13.69999981	34.29999924	4.320000172	95	146	1.779999971	214.3000031	14.52000046	149.7599945	15.48999977	0.26699999	65	74.69999695	7.382999897	45	4	126	44	102	76	83	31.29999924	71.3333333333333	165.999993222222	165.999993222222
252	male	1	14.39999962	41.90000153	4.739999771	215	142.6999969	1.870000005	24906	100	115.5	4.349999905	0.214000002	30	125	7.381000042	53	1	137	85	161	39	94	30.60000038	102.333333333333	235.849056603774	235.849056603774
281	male	0	14.69999981	48.59999847	3.930000067	91	146.8999939	2.039999962	492.2999878	3.019999981	200	8.56000042	0.360000014	155	99	7.34100008	45	6.5	129	76	143	44	93	26.20000076	93.6666666666667	220	220
284	female	0	19.10000038	41.29999924	4.71999979	125	139.1999969	1.799999952	1469	100	196.6999969	12.59000015	0.319000006	159	92.30000305	7.339000225	45	2.5	124	78	115	28	80	24	93.3333333333333	205.111117888889	205.111117888889
286	female	0	13.60000038	38.90000153	3.710000038	49	141.3999939	1.99000001	1397	14.40999985	172	3.720000029	0.32100001	31	127	7.40500021	33	1	134	54	94	24	67	27.10000038	80.6666666666667	384.848484848485	384.848484848485
288	male	0	15.30000019	60.5	3.609999895	78	141.1000061	2	222.6999969	1.330000043	114.8600006	5.489999771	0.303000003	62	134	7.428999901	33	1.700000048	104	64	96	21	85	25.89999962	77.3333333333333	406.060606060606	406.060606060606
293	male	0	14.69999981	45.79999924	4.369999886	129	143.8000031	2.079999924	2134	20.21999931	134.6999969	9.899999619	0.381000012	141	64.69999695	7.43599987	61	1.799999952	152	86	162	30	85	29.29999924	108	106.065568770492	106.065568770492
295	female	0	17.79999924	53.59999847	3.74000001	175	148.3000031	1.870000005	3237	19.43000031	193.6000061	13.57999992	0.351999998	193	77.80000305	7.429999828	33	5.099999905	138	89	112	30	83	20.10000038	105.333333333333	235.757585	235.757585
298	male	0	22.20000076	66	3.910000086	118	145.6999969	1.75999999	5940	100	189.1999969	7.639999866	0.310000002	65	183	7.18900013	65	7.599999905	127	65	143	34	26	20.70000076	85.6666666666667	281.538461538462	281.538461538462
301	female	0	21.20000076	55.5	3.670000076	64	139.3999939	1.850000024	2647	24.09000015	104.1999969	12.77000046	0.291999996	112	76.30000305	7.374000072	33	2.700000048	187	93	136	26	74	26.70000076	124.333333333333	231.212130454545	231.212130454545
304	male	0	14	47.29999924	3.420000076	175	141.8999939	1.99000001	1818	0.893000007	165.8000031	8.460000038	0.298000008	83	83.80000305	7.427999973	29	1.100000024	144	78	94	22	55	26.89999962	100	288.965527758621	288.965527758621
305	female	0	12.30000019	35.29999924	3.930000067	51	145.1999969	1.820000052	6308	21.97999954	200	11.75	0.280000001	162	99.19999695	7.452000141	29	1.5	102	59	112	27	59	38.40000153	73.3333333333333	342.068955	342.068955
306	male	0	14.19999981	42.59999847	4.159999847	73	135.8999939	1.75	1628	37.54999924	148.2899933	8.630000114	0.395999998	90	115	7.414000034	33	0.899999976	128	85	142	22	66	24.39999962	99.3333333333333	348.484848484848	348.484848484848
307	male	0	16.79999924	48.79999924	5.460000038	263	134.6000061	1.970000029	1271	35.31999969	72	13.92000008	0.393999994	132	130	7.423999786	33	4.300000191	127	65	122	27	86	21.29999924	85.6666666666667	393.939393939394	393.939393939394
308	female	1	14.89999962	35.70000076	4.670000076	655	150.6000061	1.710000038	1116	4.110000134	179.6799927	16.34000015	0.273000002	158	139	7.22300005	41	1.5	116	62	122	32	65	19.70000076	80	339.024390243902	339.024390243902
309	male	1	17.70000076	52.20000076	5.199999809	445	154	1.929999948	3233	2.380000114	177.1000061	7.889999866	0.234999999	33	78.30000305	7.506999969	33	1.899999976	133	49	97	74	94	27.29999924	77	237.272736515152	237.272736515152
316	male	0	16.5	53.59999847	3.980000019	110	144.6999969	1.980000019	12134	46.24000168	95.59999847	11.30000019	0.331999987	112	108	7.446000099	29	2.900000095	92	58	118	26	70	31.10000038	69.3333333333333	372.413793103448	372.413793103448
317	female	0	15.19999981	58.59999847	3.480000019	51	144.6999969	1.889999986	131	0.282000005	157.8999939	6.409999847	0.284999996	175	71	7.43599987	41	2.599999905	135	72	118	44	55	30.60000038	93	173.170731707317	173.170731707317
321	male	0	13.69999981	46.09999847	3.150000095	87	136.5	2.170000076	1446	1.450000048	58.36000061	6.079999924	0.317999989	205	62.09999847	7.479000092	21	1.399999976	123	71	112	25	77	30.10000038	88.3333333333333	295.714278428571	295.714278428571
326	male	1	14	35.5	4.820000172	172	139.3999939	2.50999999	172	56.7	58.34999847	1.889999986	0.356999993	73	43	7.084000111	100	5.300000191	76	56	158	33	77	35.1	62.6666666666667	43	43
328	male	1	22.60000038	98.40000153	5.690000057	188	130.8999939	1.710000038	35000	100	60.36000061	22.62999916	0.209999993	79	113	7.309999943	40	2.099999905	108	52	174	23	71	20.6	70.6666666666667	282.5	282.5
330	male	0	15.89999962	54.90000153	4.159999847	136	140	1.700000048	2234	100	334.6000061	14.93999958	0.342999995	35	157	7.339000225	33	7.300000191	129	76	118	38	77	25.20000076	93.6666666666667	475.757575757576	475.757575757576
332	male	0	14.39999962	44.29999924	3.690000057	126	145.8999939	2.089999914	1480	1.059999943	200	5.820000172	0.294999987	161	146	7.381000042	33	1.299999952	109	52	114	22	90	30.79999924	71	442.424242424242	442.424242424242
334	female	0	16.39999962	49.20000076	4.300000191	264	143	1.909999967	31414	53.84000015	200	7.239999771	0.273999989	51	114	7.340000153	33	2.099999905	165	76	104	24	76	29.70000076	105.666666666667	345.454545454545	345.454545454545
339	female	0	19.39999962	41.90000153	4.130000114	38	146.6999969	1.919999957	1038	0.806999981	59.90000153	10.15999985	0.298000008	85	146	7.453999996	33	2.700000048	140	72	130	31	76	24	94.6666666666667	442.424242424242	442.424242424242
340	male	1	25.70000076	45	3.890000105	125	135	1.860000014	629.4000244	49.77999878	112.3399963	7.510000229	0.193000004	9	127	7.455999851	21	10.39999962	100	67	116	26	50	21.20000076	78	604.761904761905	604.761904761905
343	female	0	21.70000076	41.20000076	3.150000095	89	144.8999939	1.950000048	35000	0.917999983	140.8000031	18.46999931	0.307999998	81	65.30000305	7.296999931	41	9.199999809	99	62	150	34	71	25.70000076	74.3333333333333	159.268300121951	159.268300121951
350	male	0	25.60000038	60.40000153	4.019999981	79	140.6000061	1.889999986	1170	6.789999962	85.59999847	16.92000008	0.367000014	78	114	7.376999855	55	5.900000095	128	77	108	36	75	24.20000076	94	207.272727272727	207.272727272727
353	female	0	15	32.70000076	4.53000021	69	141.3000031	1.99000001	5583	0.204999998	41.09999847	11.97000027	0.335999995	178	102	7.193999767	45	2.5	134	59	106	27	79	22.89999962	84	226.666666666667	226.666666666667
361	male	0	13.89999962	40.79999924	3.549999952	247	142.1000061	2	1644	100	209.1999969	14.63000011	0.372000009	129	82.90000153	7.363999844	41	2.400000095	102	62	112	22	59	29.20000076	75.3333333333333	202.195125682927	202.195125682927
362	female	0	17.10000038	53.40000153	3.230000019	61	141.3999939	1.860000014	3241	20.47999954	210.3999939	12.81999969	0.256000012	74	64.30000305	7.357999802	29	2	110	56	150	40	32	24	74	221.724148448276	221.724148448276
365	male	0	14.30000019	35.90000153	4.139999866	212	147.5	1.620000005	3032	72.76000214	118.4000015	10.84000015	0.368000001	126	126	7.453999996	33	2.400000095	118	63	105	22	62	33.59999847	81.3333333333333	381.818181818182	381.818181818182
366	male	0	14	48.90000153	4.28000021	70	136.6999969	2	1996	1.019999981	124.4599991	10.40999985	0.316000015	212	88.5	7.499000072	29	2	146	98	113	28	77	26.29999924	114	305.172413793103	305.172413793103
372	male	0	14.89999962	34.20000076	3.75999999	166	139.8000031	1.929999948	3012	2.49000001	200	19.45000076	0.375999987	181	60.70000076	7.492000103	21	1.399999976	140	60	176	32	79	25.39999962	86.6666666666667	289.047622666667	289.047622666667
375	male	1	15.80000019	46.09999847	4.599999905	181	138.3000031	2.119999886	35000	10.87599999	111.9000015	11.72999954	0.338999987	51	56.59999847	7.381999969	29	8	112	79	141	30	86	33.79999924	90	195.172408517241	195.172408517241
376	male	1	13.19999981	34.5	3.970000029	90	145.1999969	1.570000052	1821	100	38.36000061	11.48999977	0.360000014	164	45.20000076	7.493999958	61	2	133	87	116	38	83	35.40000153	102.333333333333	74.0983619016394	74.0983619016394
378	female	0	15.89999962	64.30000305	3.900000095	81	143	1.75	4451	9.899999619	200	5.289999962	0.246000007	91	166	7.315000057	45	6.400000095	96	38	237	22	74	25.29999924	57.3333333333333	368.888888888889	368.888888888889
380	male	0	18	56.59999847	4.449999809	230	144.5	1.75	3142	100	4.309999943	16.65999985	0.289999992	71	179	7.271999836	50	4.900000095	124	75	116	32	64	25.70000076	91.3333333333333	358	358
381	female	0	18.20000076	57.70000076	3.5	262	143.6999969	1.789999962	19517	100	255.2899933	11.27999973	0.245000005	18	119	7.316999912	33	2.5	141	68	161	36	48	26.5	92.3333333333333	360.606060606061	360.606060606061
384	male	0	17	58.40000153	4.789999962	230	142.5	2.150000095	15267	76	200	6.75	0.361000001	112	70.30000305	7.269000053	33	8.100000381	139	87	158	34	82	25.10000038	104.333333333333	213.030312272727	213.030312272727
386	male	1	19.39999962	69.30000305	3.400000095	134	145.5	1.929999948	1854	52.66999817	49.5	2.339999914	0.209999993	63	174	7.394999981	41	2.900000095	95	66	113	28	62	26.70000076	75.6666666666667	424.390243902439	424.390243902439
388	female	1	14.39999962	61.90000153	4.550000191	157	131.8000031	1.860000014	7763	3.470000029	86.59999847	11.06000042	0.287	56	18.39999962	6.903999805	53	1.799999952	91	51	92	33	87	30.60000038	64.3333333333333	34.7169804150943	34.7169804150943
390	male	0	17.20000076	88.30000305	3.940000057	140	134.8999939	2.049999952	12746	28.31999969	200	10.23999977	0.349000007	164	66.40000153	7.333000183	29	4.400000095	120	81	123	74	83	25.79999924	94	228.965522517241	228.965522517241
394	male	0	14.80000019	43.90000153	3.579999924	120	142.1999969	1.929999948	2841	34.81000137	200	5.449999809	0.300000012	60	190	7.402999878	41	4.599999905	90	54	160	30	65	38.79999924	66	463.414634146341	463.414634146341
397	male	0	16.70000076	62.70000076	3.789999962	190	142	2.069999933	8616	4.730000019	159.1699982	5.28000021	0.270000011	102	116	7.406000137	33	1.600000024	130	60	106	32	79	34.20000076	83.3333333333333	351.515151515152	351.515151515152
402	male	0	15.19999981	48.70000076	4.28000021	98	138.8000031	1.860000014	256.6000061	30.70000076	122.0999985	22.87999916	0.335000008	90	167	7.40899992	33	3.400000095	104	64	102	31	60	25.70000076	77.3333333333333	506.060606060606	506.060606060606
408	male	0	17.10000038	43	3.119999886	49	138.8999939	1.74000001	1965	2.450000048	152.1799927	10.81000042	0.277999997	159	108	7.410999775	33	2.700000048	95	47	114	39	63	27.5	63	327.272727272727	327.272727272727
420	female	0	14.5	50.09999847	3.380000114	86	142.8000031	1.769999981	4220	3.049999952	90.16000366	2.779999971	0.248999998	26	74.59999847	7.493000031	33	2.799999952	142	63	98	24	75	23.89999962	89.3333333333333	226.060601424242	226.060601424242
421	male	0	19.60000038	46.29999924	3.869999886	271	141.1999969	1.879999995	2940	100	153.6999969	13.47999954	0.229000002	203	82.19999695	7.386000156	29	12.69999981	133	82	136	24	85	23.79999924	99	283.448265344828	283.448265344828
424	male	0	15.39999962	49.29999924	3.700000048	83	139	1.860000014	578.2000122	18.54999924	200	24.39999962	0.379000008	248	61.20000076	7.416999817	29	3.099999905	145	85	139	30	70	25.5	105	211.03448537931	211.03448537931
426	male	1	17.20000076	53.40000153	4.670000076	286	145.8999939	1.970000029	4562	9.680000305	200	14.47000027	0.123000003	167	131	7.369999886	41	3.400000095	160	86	106	28	60	27.5	110.666666666667	319.512195121951	319.512195121951
429	male	1	16.70000076	38	3.119999886	115	142.1000061	1.809999943	6768	28.82	67.61000061	6.739999771	0.216999993	67	104	7.330999851	45	4.400000095	101	59	203	36	73	22.1	73	231.111111111111	231.111111111111
435	male	0	14.19999981	45.20000076	4.050000191	63	142.1999969	2.079999924	2211	1.590000033	44.40000153	10.75	0.324000001	172	70.80000305	7.400000095	29	1.299999952	109	67	105	24	82	30.79999924	81	244.137941551724	244.137941551724
439	male	0	15.19999981	46.90000153	4.690000057	697	145.3000031	1.700000048	26154	100	187.3999939	11.31999969	0.328000009	106	124	7.30700016	33	2	180	70	180	28	88	29.70000076	106.666666666667	375.757575757576	375.757575757576
440	male	1	16.20000076	41.79999924	3.910000086	168	140.6999969	1.970000029	35000	65.18000031	200	22.94000053	0.273000002	112	72.19999695	7.342000008	45	6.199999809	109	60	160	48	86	25	76.3333333333333	160.444437666667	160.444437666667
442	female	0	16.10000038	42.70000076	3.539999962	44	139.6999969	1.769999981	1488	9.43999958	200	8.109999657	0.298999995	137	67.09999847	7.446000099	29	2.700000048	132	67	94	26	71	24.10000038	88.6666666666667	231.379305068966	231.379305068966
445	female	0	21.60000038	45.20000076	4.789999962	166	153.6000061	1.799999952	1898	52.79000092	200	6.760000229	0.328000009	161	61	7.43900013	53	4.800000191	120	74	161	41	82	22.79999924	89.3333333333333	115.094339622642	115.094339622642
446	female	1	16.89999962	51	3.480000019	38	137.8000031	1.929999948	1971	43.77000046	145.6000061	14.35000038	0.349000007	145	59.90000153	7.446000099	41	2.900000095	153	99	165	38	80	22.5	117	146.097564707317	146.097564707317
448	male	1	14.39999962	47.90000153	3.569999933	93	135.3999939	2	1202	31.37999916	228.6000061	5.599999905	0.393999994	172	59.29999924	7.451000214	29	1.899999976	114	71	126	33	73	25.60000038	85.3333333333333	204.482756	204.482756
457	female	0	14.19999981	37.59999847	3.930000067	45	139.1000061	2.019999981	1124	0.823000014	127.1999969	9.829999924	0.263999999	215	140	7.494999886	33	3.200000048	107	59	136	30	25	22.39999962	75	424.242424242424	424.242424242424
459	male	0	18.60000038	41	3.299999952	62	141.3000031	2.029999971	616.5999756	16.78000069	168.8000031	9.329999924	0.432999998	156	133	7.468999863	33	1.299999952	137	88	125	24	63	32.79999924	104.333333333333	403.030303030303	403.030303030303
461	male	1	18	98.90000153	5.760000229	311	142.5	1.769999981	2589	100	53.45999908	16.67000008	0.412	102	34	6.914999962	100	16	24	20	195	30	77	31.8	21.3333333333333	34	34
462	female	0	15.30000019	46.70000076	4.659999847	243	135.8000031	1.879999995	733.0999756	2.099999905	200	1.799999952	0.182999998	8	91.59999847	7.379000187	33	1.200000048	133	79	137	30	75	27	97	277.575752939394	277.575752939394
466	male	1	29.29999924	57.40000153	3.480000019	140	138.3000031	1.889999986	11696	10.85000038	142.6999969	4.5	0.312999994	57	144	7.465000153	33	4	100	76	133	32	85	31.60000038	84	436.363636363636	436.363636363636
469	male	1	16.5	46.70000076	3.720000029	78	141.5	2.029999971	129.1999969	0.805999994	141.5	10.43000031	0.358999997	155	114	7.506999969	33	2.5	139	81	143	26	21	30.89999962	100.333333333333	345.454545454545	345.454545454545
470	female	0	13.19999981	44.09999847	3.869999886	227	142.1999969	2.099999905	1710	65.26000214	200	3.74000001	0.32100001	76	96.40000153	7.458000183	21	1.700000048	105	72	81	58	67	28	83	459.047626333333	459.047626333333
475	male	0	15.69999981	48.29999924	3.470000029	91	140.8999939	2.150000095	591.7999878	11.47999954	200	18.38999939	0.342999995	206	76.80000305	7.440999985	37	2.099999905	114	67	106	24	77	32.5	82.6666666666667	207.567575810811	207.567575810811
476	male	0	14.19999981	43.09999847	3.579999924	107	144.6000061	2.140000105	441	25.87999916	175	5.519999981	0.363000005	117	107	7.461999893	33	1.700000048	121	82	98	20	63	33.40000153	95	324.242424242424	324.242424242424
479	male	1	13.30000019	46.20000076	3.849999905	129	145.6999969	2.220000029	2686	18.28000069	226.8999939	21.60000038	0.384000003	246	97.80000305	7.440999985	33	2.900000095	165	87	142	183	79	30.89999962	113	296.363645606061	296.363645606061
481	male	0	14.60000038	41.5	3.640000105	115	155.8000031	1.99000001	2805	3.119999886	200	14.31000042	0.368000001	87	67.40000153	7.434999943	33	5.199999809	129	76	231	26	82	21.5	93.6666666666667	204.242428878788	204.242428878788
486	female	1	18.5	43.79999924	4.389999866	145	146.3000031	1.899999976	35000	100	170.7100067	33.40999985	0.308999985	70	154	7.274000168	21	4	110	58	160	36	95	26.60000038	75.3333333333333	733.333333333333	733.333333333333
489	female	0	17.5	55	4.010000229	61	141.8999939	1.610000014	4725	2.130000114	200	8.569999695	0.326000005	54	124	7.410999775	41	2.599999905	91	61	125	36	64	26.5	71	302.439024390244	302.439024390244
491	male	0	15.39999962	46.5	4.46999979	134	140.6999969	1.789999962	1841	4.159999847	200	10.43999958	0.314999998	162	118	7.326000214	21	1.399999976	119	80	90	24	58	30.39999962	93	561.904761904762	561.904761904762
495	female	0	14.30000019	41.5	4.039999962	66	136.8000031	1.909999967	1900	6.840000153	200	8.619999886	0.300999999	116	109	7.471000195	33	0.800000012	126	65	94	24	83	27.70000076	85.3333333333333	330.30303030303	330.30303030303
505	female	0	19.89999962	56.79999924	3.799999952	67	138.5	1.779999971	14631	25.46999931	181.8999939	25.44000053	0.246999994	246	148	7.396999836	33	2.299999952	98	58	138	28	72	18.5	71.3333333333333	448.484848484848	448.484848484848
507	male	0	14.19999981	47.29999924	3.299999952	105	140.8999939	1.789999962	2618	100	200	5	0.323000014	72	83.19999695	7.429999828	29	1.799999952	123	67	142	26	70	26.20000076	85.6666666666667	286.896541206897	286.896541206897
508	male	0	14.10000038	38	4.010000229	104	135.1999969	1.909999967	4954	24.48999977	120.0400009	8.970000267	0.351000011	62	94.19999695	7.397999763	50	2	107	62	105	36	86	26.60000038	77	188.3999939	188.3999939
509	male	0	16.79999924	55	3.920000076	73	142.3999939	1.980000019	6466	35.95000076	194.6799927	10.39999962	0.158999994	85	108	7.415999889	33	3	105	58	107	21	83	34	73.6666666666667	327.272727272727	327.272727272727
510	male	0	14.19999981	53.5	3.609999895	70	140.5	2.059999943	538.0999756	51.77999878	151.2299957	4.429999828	0.340000004	159	87.19999695	7.452000141	33	1.100000024	129	71	125	108	84	31.70000076	90.3333333333333	264.242415	264.242415
511	male	0	20.10000038	46.70000076	3.299999952	133	148.6000061	1.909999967	14500	100	237.4700012	21.73999977	0.307999998	41	84	7.368999958	33	9.199999809	151	88	136	28	77	27.70000076	109	254.545454545455	254.545454545455
516	female	0	15.19999981	46	3.859999895	72	144.8999939	1.75	262	5.789999962	150.8000031	13.82999992	0.32100001	273	80.40000153	7.377999783	29	2.099999905	126	83	112	24	80	25.29999924	97.3333333333333	277.241384586207	277.241384586207
518	male	0	15.19999981	43	3.690000057	101	134.8999939	1.889999986	488	99.58999634	178.1000061	7.340000153	0.349999994	58	141	7.427000046	33	2	96	66	108	20	46	33.5	76	427.272727272727	427.272727272727
520	male	0	15.69999981	31.5	3.910000086	135	141	2.029999971	680.2999878	10.18000031	87.5	8.319999695	0.308999985	42	89	7.421000004	29	1.5	116	69	97	24	78	30.70000076	84.6666666666667	306.896551724138	306.896551724138
521	male	0	15	44	4.230000019	92	143.1999969	1.830000043	2664	0.303000003	141.6999969	9.760000229	0.331	335	119	7.336999893	33	1.299999952	131	61	99	30	77	21.60000038	84.3333333333333	360.606060606061	360.606060606061
527	female	0	15.39999962	48.09999847	3.849999905	66	143.1999969	1.710000038	230.1999969	3.130000114	200	3.75999999	0.229000002	77	133	7.339000225	29	1.5	118	53	100	24	85	27	74.6666666666667	458.620689655172	458.620689655172
529	female	0	13.89999962	36	3.660000086	51	142.8000031	2.140000105	50.29999924	6.300000191	20.29999924	5.050000191	0.321999997	186	95.90000153	7.498000145	21	2.900000095	97	59	111	24	26	35.79999924	71.6666666666667	456.666673952381	456.666673952381
530	male	0	14	33	4.409999847	114	141.8000031	2.029999971	542.0999756	15.40999985	92.90000153	4.980000019	0.240999997	302	72.59999847	7.419000149	29	0.699999988	147	80	99	23	79	37.29999924	102.333333333333	250.344822310345	250.344822310345
531	male	0	15.69999981	40.90000153	4.420000076	105	140.8999939	1.940000057	438	3.24000001	290.0599976	6.829999924	0.326000005	277	72.69999695	7.471000195	33	3.099999905	103	56	133	28	68	21.70000076	71.6666666666667	220.303021060606	220.303021060606
532	male	0	13.39999962	46.5	3.700000048	101	137.3000031	2.109999895	2107	1.1	200	6.440000057	0.372999996	119	103	7.368000031	29	1	80	52	130	27	88	31.29999924	61.3333333333333	355.172413793103	355.172413793103
533	female	1	81.19999695	180	5.639999866	529	137.1999969	1.519999981	35000	2.690000057	25.12000084	12.55000019	0.356000006	70	287	7.232999802	60	14.30000019	106	58	139	35	73	39.59999847	74	478.333333333333	478.333333333333
534	male	0	15.19999981	51.5	4.050000191	438	140.1000061	1.789999962	6993	100	200	10.39000034	0.388999999	168	77	7.394999981	41	1.899999976	140	71	92	31	80	30.10000038	94	187.80487804878	187.80487804878
545	female	0	18.89999962	63.20000076	4.349999905	109	142.5	1.779999971	8656	100	222.9100037	4.289999962	0.219999999	61	138	7.323999882	33	3.200000048	173	64	122	210	71	29.10000038	100.333333333333	418.181818181818	418.181818181818
546	female	1	18.60000038	86.80000305	5.78000021	562	129.1999969	2.089999914	35000	9.239999771	108.9599991	11.06999969	0.202999994	137	121	7.001999855	100	7.099999905	53	36	119	31	88	28.1	41.6666666666667	121	121
550	male	0	13.89999962	38.09999847	2.940000057	124	143.8000031	2.029999971	3109	5.449999809	133.1499939	8.350000381	0.377999991	96	92.30000305	7.360000134	33	4.699999809	138	68	133	30	86	30.39999962	91.3333333333333	279.696978939394	279.696978939394
551	male	0	16.29999924	55.29999924	3.980000019	169	143.8000031	1.99000001	2274	9.420000076	200	13.05000019	0.284000009	17	94.90000153	7.451000214	33	1.299999952	89	54	96	29	87	25	65.6666666666667	287.575762212121	287.575762212121
552	male	0	15.80000019	55.29999924	3.690000057	165	136.3999939	1.970000029	6331	33.49000168	192	6.96999979	0.331999987	146	96.40000153	7.47300005	29	1	125	78	115	34	73	24.20000076	93.6666666666667	332.41379837931	332.41379837931
555	female	0	19.60000038	47.09999847	3.599999905	164	151.8000031	1.779999971	13434	6.96999979	200	24.43000031	0.301999986	90	94.80000305	7.322999954	29	3.599999905	133	64	176	35	92	23.70000076	87	326.896562241379	326.896562241379
559	female	0	24.79999924	64.09999847	3.869999886	291	148.3000031	1.730000019	972.7000122	85.84999847	200	5.929999828	0.296000004	113	87.69999695	7.270999908	41	9.100000381	128	66	107	30	66	24	86.6666666666667	213.902431585366	213.902431585366
560	female	0	14.80000019	40.70000076	3.200000048	81	140.3999939	1.950000048	2679	5.869999886	150.6999969	11.46000004	0.328999996	102	103	7.413000107	33	2.200000048	155	70	88	22	86	34.29999924	98.3333333333333	312.121212121212	312.121212121212
561	male	0	15.39999962	42.90000153	4.960000038	100	138.8000031	1.820000052	290.2999878	0.221000001	58.83000183	10.90999985	0.158000007	209	119	7.395999908	33	2.099999905	126	94	114	25	86	21.60000038	104.666666666667	360.606060606061	360.606060606061
569	male	0	15.60000038	39.70000076	4.119999886	111	138.3999939	1.980000019	2577	65.20999908	176.3200073	2.390000105	0.280000001	67	108	7.434000015	33	2.400000095	136	79	108	28	79	30.20000076	98	327.272727272727	327.272727272727
573	female	0	12.5	34.20000076	4.400000095	96	136	2.039999962	3760	24.71999931	152.8999939	17.45999908	0.289999992	50	92.19999695	7.468999863	33	2.599999905	127	72	140	24	79	24.29999924	90.3333333333333	279.393930151515	279.393930151515
579	male	0	14.60000038	34.70000076	3.680000067	74	140.6999969	2.039999962	154.8000031	6.840000153	56.09999847	4.769999981	0.40200001	76	91.40000153	7.410999775	29	2	133	92	86	34	79	34.79999924	105.666666666667	315.172419068965	315.172419068965
581	male	0	19.10000038	62.90000153	4.349999905	63	142.8000031	1.809999943	196.6999969	18.65999985	153	16.80999947	0.347000003	182	93	7.347000122	41	2.599999905	127	70	132	32	60	27.39999962	89	226.829268292683	226.829268292683
582	male	1	18.10000038	49	5.96	229	144.1	2.14	26.6	16.43	81.25	14.98999977	0.261000007	60	125	7.401000023	40	2.5	106	60	123	20	51	30.2	75.3333333333333	312.5	312.5
583	male	0	21.5	42.90000153	3.630000114	132	141.1000061	1.99000001	888.0999756	45.18999863	235.8000031	45.33000183	0.400000006	132	80.5	7.374000072	21	3.799999952	90	57	131	26	53	32	68	383.333333333333	383.333333333333
590	female	1	16.79999924	45	6.010000229	308	146.3999939	2.109999895	24896	34.09000015	208.3999939	10.81000042	0.351999998	130	69.80000305	7.448999882	84	1.600000024	129	77	135	32	96	27.39999962	94.3333333333333	83.0952417261905	83.0952417261905
591	male	0	16.60000038	47.5	4.889999866	98	133.5	1.960000038	108.6999969	1.909999967	129.3000031	8.75	0.270999998	224	90	7.327000141	29	2.900000095	108	55	92	26	90	24.20000076	72.6666666666667	310.344827586207	310.344827586207
594	male	0	15.30000019	40.5	5.400000095	120	134.8999939	1.700000048	257.2000122	10.36999989	83	13.84000015	0.204999998	328	112	7.40899992	33	4.400000095	109	71	113	32	68	24.39999962	83.6666666666667	339.393939393939	339.393939393939
596	male	0	16.79999924	44.5	3.680000067	181	147	1.889999986	20005	90.37000275	200	16.03000069	0.294	3	110	7.331999779	37	5.300000191	111	75	140	44	61	20	87	297.297297297297	297.297297297297
599	male	0	19.89999962	48.20000076	3.789999962	239	144.3000031	1.679999948	23268	46.65000153	200	34.18999863	0.374000013	113	82	7.162000179	50	5.599999905	103	72	152	40	52	25.79999924	82.3333333333333	164	164
600	male	1	18.29999924	53.20000076	4.340000153	97	138.1999969	2.230000019	1592	14.77	199.1000061	17.09000015	0.370000005	145	76.19999695	7.467999935	33	2.299999952	116	70	129	23	78	26	85.3333333333333	230.909081666667	230.909081666667
602	male	1	14.7	40	3.74000001	49	133	2.059999943	6387	100	79.02999878	3.789999962	0.328000009	82	99.69999695	7.452000141	50	1.200000048	135	90	120	38	67	28.5	105	199.3999939	199.3999939
606	male	1	20.79999924	56.90000153	5.489999771	163	138.8999939	1.789999962	35000	100	247.8000031	2.140000105	0.328999996	40	97	7.331999779	50	9.800000191	137	69	186	39	81	19.5	91.6666666666667	194	194
607	male	0	14.89999962	40.5	2.930000067	239	139.3000031	2.00999999	910.0999756	73.5	111.1999969	14.36999989	0.416999996	170	86.69999695	7.447000027	33	7.300000191	106	63	110	24	79	34.09999847	77.3333333333333	262.727263484848	262.727263484848
608	male	0	16.79999924	49.09999847	4.940000057	269	145.3000031	2.150000095	5719	27.29000092	240.1799927	21.82999992	0.393000007	104	128	7.468999863	33	3.400000095	110	67	129	24	70	24.79999924	81.3333333333333	387.878787878788	387.878787878788
610	male	1	31.39999962	65.80000305	6.179999828	214	134.5	2	35000	25.61000061	200	23.80999947	0.268000007	43	115	7.090000153	60	5.099999905	34	24	164	24	86	31.10000038	27.3333333333333	191.666666666667	191.666666666667
611	female	1	13.8	39.1	4.29	150	142.8	2.4	17110	100	200	25.13	0.23	81	137	7.256999969	40	10.19999981	50	23	142	33	78	32.8	32	342.5	342.5
612	male	0	14.5	43.5	4.340000153	193	142.3999939	1.980000019	1069	47.20999908	200	19.42000008	0.307000011	251	68.5	7.431000233	21	1.799999952	144	78	98	20	88	22.89999962	100	326.190476190476	326.190476190476
613	male	0	14.30000019	40.40000153	3.940000057	75	137.8999939	2.130000114	479.6000061	2.900000095	155.1000061	16.78000069	0.356999993	141	72.80000305	7.434000015	29	1.600000024	130	69	154	29	92	28.5	89.3333333333333	251.034493275862	251.034493275862
614	male	0	13.39999962	50.29999924	4.949999809	286	137.3999939	1.830000043	3535	4.21999979	190.1999969	8.680000305	0.226999998	363	84.80000305	7.363999844	33	1.200000048	135	50	91	22	80	31.39999962	78.3333333333333	256.969706212121	256.969706212121
615	female	0	13.30000019	52.79999924	3.200000048	132	142.5	2.140000105	394	7.460000038	200	3.519999981	0.301999986	162	86.5	7.441999912	29	1.100000024	125	76	114	28	70	30.5	92.3333333333333	298.275862068966	298.275862068966
620	male	0	15.5	59.29999924	3.930000067	105	140.1999969	1.779999971	14607	45.18000031	200	3.589999914	0.209999993	47	106	7.274000168	50	2.299999952	146	71	131	36	76	28	96	212	212
632	male	0	20.20000076	60.40000153	3.069999933	318	143	1.669999957	34430	60.75999832	200	32.52000046	0.338	3	90.09999847	7.359000206	29	6.800000191	127	79	138	38	61	26.29999924	95	310.689649896552	310.689649896552
640	male	0	16.5	50.29999924	3.549999952	61	141.1000061	2.019999981	1964	0.263999999	200	7.010000229	0.275000006	219	158	7.447000027	29	1.100000024	118	68	96	24	72	27.89999962	84.6666666666667	544.827586206897	544.827586206897
643	female	0	14.19999981	38.5	4.730000019	55	138.3000031	1.909999967	3015	0.592000008	51	31.76000023	0.263999999	194	118	7.383999825	33	2.5	108	70	123	24	88	27.70000076	82.6666666666667	357.575757575758	357.575757575758
646	male	0	16.5	42.09999847	4.429999828	78	138.3000031	2.119999886	3077	32.93000031	125.1999969	16.29999924	0.324999988	78	92.5	7.443999767	21	2.299999952	111	62	151	22	79	32.70000076	78.3333333333333	440.47619047619	440.47619047619
648	female	0	15.5	48.5	3.950000048	132	142.1000061	1.879999995	1767	85.15000153	146.3000031	20.97999954	0.272000015	106	101	7.43599987	21	1.700000048	117	62	91	20	71	29.70000076	80.3333333333333	480.952380952381	480.952380952381
650	male	0	17	36.09999847	3.890000105	124	143.6000061	1.960000038	5653	76.81999969	136.8999939	22.23999977	0.358999997	80	77.40000153	7.342999935	33	4.199999809	115	70	153	32	87	29.39999962	85	234.545459181818	234.545459181818
651	female	0	13.60000038	36.5	3.99000001	87	145.3000031	2.119999886	768.0999756	0.660000026	149.0200043	7.71999979	0.323000014	127	62	7.410999775	50	2.799999952	112	57	110	34	74	21.5	75.3333333333333	124	124
653	male	1	21.89999962	49.59999847	4.639999866	150	144.6000061	2.039999962	10000	6.400000095	62.22999954	9.020000458	0.236000001	92	112	7.395999908	41	3.200000048	138	51	143	29	82	26.5	80	273.170731707317	273.170731707317
656	female	0	12.69999981	33.29999924	3.119999886	86	145.8000031	1.870000005	5835	100	200	20.04000092	0.34799999	41	85.40000153	7.381999969	33	2.5	133	93	148	37	67	29	106.333333333333	258.787883424242	258.787883424242
657	female	0	14	41.79999924	3.329999924	84	143.5	1.700000048	2488	27.26000023	162.6000061	10.35999966	0.247999996	88	152	7.428999901	33	1.100000024	123	67	119	25	77	22.89999962	85.6666666666667	460.606060606061	460.606060606061
660	female	0	14.89999962	33.5	3.809999943	71	143.8999939	1.830000043	957.2000122	1.399999976	58.93000031	4.440000057	0.308999985	181	80	7.394000053	21	2.599999905	122	56	100	20	58	38.09999847	78	380.952380952381	380.952380952381
662	female	0	13.5	53.5	3.190000057	107	140.1000061	1.74000001	1499	34.84999847	189.8000031	3.890000105	0.25	82	151	7.445000172	29	1.899999976	95	57	110	22	70	27.20000076	69.6666666666667	520.689655172414	520.689655172414
665	male	0	14.80000019	53.90000153	3.470000029	60	131.3000031	2	4674	11.02999973	164	12.11999989	0.293000013	89	112	7.370999813	33	2	108	72	146	22	64	31.39999962	84	339.393939393939	339.393939393939
666	female	0	16.60000038	50	3.369999886	78	139.5	1.929999948	2014	30.93000031	116.3000031	18.62999916	0.305000007	135	106	7.382999897	33	3.900000095	104	63	102	22	70	30	76.6666666666667	321.212121212121	321.212121212121
668	male	0	15.80000019	44	4.639999866	137	145.8999939	2.160000086	849.7000122	4.329999924	200	8.170000076	0.354999989	177	84.59999847	7.440999985	33	3.299999952	129	83	116	22	83	25.79999924	98.3333333333333	256.363631727273	256.363631727273
679	female	1	17.29999924	49.40000153	2.940000057	180	146.8999939	1.379999995	9521	100	176.6000061	5.010000229	0.246000007	95	128	7.429999828	33	8	143	68	126	38	50	19.29999924	93	387.878787878788	387.878787878788
682	male	0	15.89999962	46.29999924	4.420000076	98	145.8000031	1.980000019	1393	60.93999863	111.5899963	3.539999962	0.354999989	152	109	7.399000168	21	5.900000095	158	102	159	26	68	35.5	120.666666666667	519.047619047619	519.047619047619
684	female	0	14.39999962	40.90000153	3.599999905	181	137.6000061	1.690000057	6049	100	182.8000031	4.090000153	0.31099999	170	139	7.43900013	33	1.5	93	42	110	24	73	29.29999924	59	421.212121212121	421.212121212121
691	male	0	14.5	44.09999847	3.539999962	111	139.3999939	1.899999976	3813	14.64000034	169.8999939	13.07999992	0.330000013	119	89.40000153	7.388999939	37	1	125	83	102	32	36	29.39999962	97	241.621625756757	241.621625756757
692	female	0	14.19999981	40.70000076	4	46	142.6000061	2.150000095	47	2.789999962	200	3.900000095	0.324000001	117	126	7.416999817	29	0.899999976	142	97	140	31	50	38.29999924	112	434.48275862069	434.48275862069
695	female	0	32.40000153	97.5	4.539999962	121	142.8000031	1.779999971	1779	29.81999969	151.0399933	19.77000046	0.193000004	13	86.90000153	7.119999886	33	15	99	52	101	26	68	22.29999924	67.6666666666667	263.333337969697	263.333337969697
697	male	1	19.10000038	38.59999847	4.119999886	19	156.5	2.059999943	909.2999878	1.169999957	200	14.17000008	0.437000006	246	91.09999847	7.160999775	33	1.799999952	94	55	145	30	30	31.20000076	68	276.060601424242	276.060601424242
706	female	0	12.80000019	39.09999847	3.599999905	166	143.1000061	2.210000038	3413	6.699999809	115.5	7.630000114	0.39199999	151	99	7.394000053	33	0.800000012	105	52	112	24	81	35.79999924	69.6666666666667	300	300
710	female	0	12.60000038	42.29999924	4.059999943	63	140.3999939	2.150000095	373.3999939	8.789999962	24.70000076	4.300000191	0.354000002	183	76.30000305	7.438000202	29	0.800000012	135	78	89	26	82	32.20000076	97	263.103458793103	263.103458793103
715	male	0	16.79999924	59.20000076	4.409999847	130	139.5	2	702.4000244	32.40999985	200	5.829999924	0.31099999	81	89.30000305	7.412000179	33	0.899999976	120	62	98	26	79	30.5	81.3333333333333	270.606069848485	270.606069848485
721	male	0	16.79999924	50.70000076	3.930000067	304	148.3000031	1.889999986	7171	100	198.1600037	9.489999771	0.344999999	128	88.69999695	7.354000092	21	6.699999809	119	69	127	250	84	28.29999924	85.6666666666667	422.380937857143	422.380937857143
726	female	0	14.80000019	49	3.24000001	127	140.3999939	1.769999981	3461	29.17000008	200	18.79999924	0.321999997	191	149	7.456999779	33	0.800000012	132	89	120	28	45	20.70000076	103.333333333333	451.515151515152	451.515151515152
729	female	0	15.89999962	180	4.800000191	596	136.6999969	2.410000086	5978	12.35000038	182.3999939	13.11999989	0.293000013	147	116	7.482999802	33	1	127	80	132	22	47	35.70000076	95.6666666666667	351.515151515152	351.515151515152
731	female	0	16	43.90000153	3.660000086	167	144.1000061	1.970000029	1347	68.95999908	95.09999847	18.06999969	0.303000003	132	123	7.320000172	33	1.899999976	114	66	107	26	57	32.29999924	82	372.727272727273	372.727272727273
732	male	0	15.39999962	43.09999847	3.460000038	325	151	1.840000033	2657	100	230.3999939	13	0.31400001	100	157	7.46999979	33	3.700000048	151	79	111	30	89	26.60000038	103	475.757575757576	475.757575757576
733	male	0	21.5	57.20000076	4.449999809	158	144.8999939	1.75999999	9737	100	200	15.59000015	0.331	155	86	7.229000092	50	13.69999981	126	60	154	48	80	24.79999924	82	172	172
737	male	0	14.69999981	47.5	3.730000019	78	139	1.889999986	1434	5.409999847	173.6000061	27.11000061	0.375999987	222	68	7.497000217	33	2.799999952	88	50	118	30	75	21.39999962	62.6666666666667	206.060606060606	206.060606060606
740	male	1	14.39999962	38.90000153	3.900000095	63	137.8000031	2.150000095	287.5	100	66.59999847	15.02000046	0.317000002	307	45.40000153	7.434999943	45	1.799999952	96	65	138	26	79	27.39999962	75.3333333333333	100.888892288889	100.888892288889
743	female	0	16.29999924	54.90000153	4.260000229	221	149.1000061	2.019999981	14727	100	247.9600067	7.210000038	0.280000001	62	170	7.309999943	33	2	116	53	80	29	73	27.29999924	74	515.151515151515	515.151515151515
746	female	0	17.60000038	44.5	3.200000048	72	144.6000061	1.840000033	4750	50.95999908	240.3000031	0.560000002	0.213	9	87.59999847	7.493000031	33	1.399999976	92	55	122	24	63	30	67.3333333333333	265.454540818182	265.454540818182
748	female	0	15.80000019	50.09999847	3.75999999	85	144.6999969	1.840000033	2376	43.13000107	179.7899933	11.61999989	0.307999998	136	90.69999695	7.387000084	33	2	95	58	140	27	64	34.09999847	70.3333333333333	274.848475606061	274.848475606061
750	male	0	17.20000076	47.90000153	3.859999895	73	136.1999969	1.860000014	595.4000244	21.37999916	140.1999969	9.579999924	0.338999987	86	77.19999695	7.31400013	33	12.10000038	110	59	125	30	89	29.39999962	76	233.93938469697	233.93938469697
751	male	1	15.6	47.7	5.230000019	319	145.8999939	1.960000038	10000	3.430000067	193.3999939	14.68999958	0.282999992	71	149	7.269000053	53	9.699999809	73	32	81	28	90	20.5	45.6666666666667	281.132075471698	281.132075471698
754	male	0	13.89999962	40.59999847	3.890000105	226	138	1.929999948	221.3999939	4.619999886	182	7.239999771	0.40200001	152	92.30000305	7.381999969	33	1.200000048	108	66	105	24	55	34.79999924	80	279.696978939394	279.696978939394
755	male	0	14.5	51.90000153	3.900000095	125	137	1.99000001	3879	9.869999886	170.6000061	10.43000031	0.279000014	67	53.20000076	7.272999763	29	3.200000048	99	61	148	36	74	28.5	73.6666666666667	183.448278482759	183.448278482759
758	male	0	15.10000038	47.29999924	4.019999981	99	142	1.879999995	2615	17.70000076	191.8999939	11.10999966	0.354000002	75	124	7.414999962	33	2.299999952	126	82	172	24	87	29.5	96.6666666666667	375.757575757576	375.757575757576
760	female	1	18.89999962	59.59999847	4.21999979	335	134.8999939	1.659999967	35000	100	243.1000061	45.40999985	0.275999993	11	84.80000305	7.265999794	50	3.700000048	170	79	152	31	77	27.5	109.333333333333	169.6000061	169.6000061
761	female	0	13.69999981	41.5	4.320000172	130	143	2.140000105	647.2999878	6.449999809	41.90000153	4.179999828	0.319999993	152	86.30000305	7.445000172	21	0.600000024	119	61	78	20	80	37.20000076	80.3333333333333	410.95239547619	410.95239547619
763	male	0	14.60000038	50.70000076	4.75	115	145.5	1.929999948	2676	100	164.5	5.110000134	0.375999987	249	53.59999847	7.428999901	29	2.200000048	143	83	178	24	81	27.10000038	103	184.827580931034	184.827580931034
764	male	0	49.29999924	66.5	4.460000038	250	144.1999969	1.440000057	3238	100	152.7299957	11.93000031	0.354999989	53	131	7.366000175	40	5.400000095	108	82	183	40	68	21.5	90.6666666666667	327.5	327.5
772	male	1	18.10000038	55.09999847	4.559999943	291	139.1999969	1.110000014	457.1000061	5.760000229	135.3600006	10.05000019	0.504000008	260	100	7.119999886	45	8.800000191	52	29	158	57	53	35.29999924	36.6666666666667	222.222222222222	222.222222222222
773	female	0	15.89999962	46.79999924	3.50999999	74	145.1999969	1.940000057	2518	71.98999786	202.3000031	12.52000046	0.323000014	104	80	7.31799984	41	6.199999809	136	79	140	80	57	27.39999962	98	195.121951219512	195.121951219512
774	female	1	15.30000019	44.40000153	3.450000048	50	136.6999969	2.089999914	8390	2.5	83.59999847	11.76000023	0.42899999	170	76.19999695	7.460999966	55	2.799999952	101	76	241	143	59	37.20000076	84.3333333333333	138.545449	138.545449
775	male	0	15.89999962	49.90000153	3.519999981	232	141.1999969	1.870000005	977.9000244	39.91999817	200	5.650000095	0.312000006	113	118	7.342999935	29	2.400000095	107	57	113	28	63	28	73.6666666666667	406.896551724138	406.896551724138
776	female	0	19.79999924	45.70000076	3.410000086	69	144	2.25	255	10.93999958	119.3000031	10.68000031	0.44600001	14	68.5	7.43599987	33	5.199999809	116	72	132	32	57	27.70000076	86.6666666666667	207.575757575758	207.575757575758
779	female	0	13.69999981	39.09999847	3.289999962	60	140.3000031	2.029999971	583.7000122	10.13000011	97.19999695	4.909999847	0.324999988	129	102	7.377999783	33	3.299999952	131	62	84	29	67	30.5	85	309.090909090909	309.090909090909
783	male	0	18	42.20000076	3.940000057	82	138.8999939	1.649999976	25.39999962	4.78000021	227.8800049	10.15999985	0.246000007	74	102	7.368000031	33	4.699999809	149	91	137	43	30	19.70000076	110.333333333333	309.090909090909	309.090909090909
784	female	0	16.39999962	43.90000153	3.980000019	102	143	2.069999933	1602	20.98999977	158.5	7.050000191	0.259000003	105	156	7.446000099	33	2.099999905	108	65	110	27	40	27.5	79.3333333333333	472.727272727273	472.727272727273
786	male	1	19.20000076	66	5.559999943	395	134.1000061	1.720000029	35000	100	257.7000122	71.70999908	0.263999999	11	77.59999847	7.004000187	100	9.800000191	107	62	144	36	85	25.20000076	77	77.59999847	77.59999847
789	male	0	14.69999981	54.90000153	4.190000057	138	143.6000061	1.940000057	422.6000061	5.360000134	200	14.23999977	0.356000006	293	50.20000076	7.433000088	21	1.399999976	131	80	120	94	75	26.79999924	97	239.047622666667	239.047622666667
794	male	0	13.39999962	59.40000153	4.010000229	131	137.5	1.820000052	1541	0.894999981	186.6399994	6.320000172	0.349999994	137	97.90000153	7.423999786	21	1.299999952	139	76	108	24	69	25	97	466.19048347619	466.19048347619
796	female	1	17.20000076	39.70000076	4.099999905	60	146.3999939	1.74000001	35000	1.480000019	39.09999847	4.460000038	0.203999996	32	115	7.372000217	49	1.100000024	95	67	134	25	69	31.20000076	76.3333333333333	234.69387755102	234.69387755102
798	male	0	31.70000076	64.09999847	3.809999943	137	144.1999969	1.870000005	939.2999878	15.56999969	85.30000305	6.460000038	0.305999994	135	104	7.377999783	29	1.299999952	115	58	101	22	80	33.20000076	77	358.620689655172	358.620689655172
801	female	0	14.19999981	55.5	3.829999924	41	138.1000061	1.929999948	3014	67.55000305	200	4.559999943	0.273999989	95	93.5	7.368000031	21	0.600000024	102	67	142	22	34	30.39999962	78.6666666666667	445.238095238095	445.238095238095
804	male	0	18.10000038	51.40000153	4.010000229	60	143.1999969	1.929999948	3667	9.520000458	61	7.630000114	0.331	136	112	7.438000202	29	2	86	50	103	24	73	28	62	386.206896551724	386.206896551724
808	male	0	17.39999962	46.40000153	3.349999905	180	146.3999939	2.190000057	1213	75.05999756	200	12.53999996	0.248999998	288	98.5	7.31099987	50	5	114	67	156	32	77	28.39999962	82.6666666666667	197	197
812	male	0	15	49	4.159999847	274	137.5	2.089999914	2841	0.787999988	200	7.28000021	0.504000008	175	55.40000153	7.40500021	21	1.5	156	87	131	22	78	30.39999962	110	263.809531095238	263.809531095238
819	male	0	15.10000038	53.59999847	3.779999971	89	139.6000061	1.970000029	1083	1.059999943	73.09999847	11.34000015	0.300999999	154	130	7.377999783	33	1.5	116	69	197	22	84	30.79999924	84.6666666666667	393.939393939394	393.939393939394
822	female	1	24.29999924	60.79999924	5.670000076	351	148.8999939	1.25999999	8888	100	200	27.04000092	0.268999994	8	81	7.224999905	80	15	56	32	118	32	71	28.60000038	40	101.25	101.25
824	male	0	17.10000038	43.29999924	4.449999809	116	137.6999969	1.980000019	3292	11.51000023	135.1999969	8.380000114	0.407999992	60	87.09999847	7.434999943	21	2.299999952	110	59	95	24	69	31.79999924	76	414.761897476191	414.761897476191
825	female	0	14.69999981	40.09999847	4.889999866	190	140.1999969	2.069999933	1571	1.75	108.5999985	3.640000105	0.289000005	101	67	7.327000141	21	2.099999905	96	52	88	27	69	32.5	66.6666666666667	319.047619047619	319.047619047619
827	female	0	13.89999962	41.79999924	4.539999962	67	138.6999969	2.130000114	282.1000061	3.289999962	200	18.95999908	0.248999998	317	119	7.389999866	37	1.700000048	105	60	114	44	34	24.60000038	75	321.621621621622	321.621621621622
833	female	0	13.80000019	45.29999924	4.179999828	69	142.3000031	2.190000057	6212	0.85799998	216.6199951	10.18000031	0.296999991	323	77.5	7.25	33	1.899999976	138	91	123	89	88	28.39999962	106.666666666667	234.848484848485	234.848484848485
839	female	0	16.60000038	48.70000076	4.110000134	89	137.6000061	2.150000095	7010	13.43000031	157.8000031	15.90999985	0.279000014	275	64.90000153	7.397999763	33	1.299999952	110	51	118	26	91	31.29999924	70.6666666666667	196.66667130303	196.66667130303
846	male	0	21.89999962	50.09999847	3.710000038	127	135	1.850000024	3959	31.09000015	112.3499985	5.179999828	0.149000004	27	53	7.456999779	41	4.699999809	111	68	145	39	53	19.79999924	82.3333333333333	129.268292682927	129.268292682927
848	male	1	24.79999924	178.8999939	4.010000229	290	138.6999969	1.799999952	1275	4.960000038	200	6.090000153	0.188999996	14	167	7.177999973	45	10.60000038	150	77	173	42	43	20.60000038	101.333333333333	371.111111111111	371.111111111111
849	female	0	14	38.29999924	4.010000229	146	148.3999939	2.00999999	3276	36.97000122	184.1999969	11.64999962	0.363000005	75	97.40000153	7.452000141	33	1.700000048	157	82	129	26	82	30	107	295.151519787879	295.151519787879
850	male	0	14.5	55	3.960000038	94	134.1000061	1.950000048	891.7000122	14.28999996	200	8.039999962	0.370000005	137	59.20000076	7.519999981	29	1.100000024	121	65	117	24	63	24.70000076	83.6666666666667	204.137933655172	204.137933655172
852	female	0	13.89999962	43.90000153	2.980000019	156	140.6000061	1.899999976	3961	45.48	200	27.77000046	0.268999994	34	71.80000305	7.326000214	29	7.300000191	102	63	144	45	37	27.20000076	76	247.586217413793	247.586217413793
865	male	0	15.80000019	43	3.940000057	180	137.8000031	1.620000005	3109	38.95999908	96.69999695	11.71000004	0.363000005	81	99.5	7.355000019	33	2.599999905	96	67	114	22	47	22.79999924	76.6666666666667	301.515151515152	301.515151515152
866	female	1	20.39999962	50.40000153	3.400000095	134	149.3999939	1.970000029	35000	34.5	200	16.29000092	0.282999992	79	112	7.382999897	50	3.799999952	103	62	172	36	88	25.5	75.6666666666667	224	224
875	male	0	17.70000076	42.59999847	3.170000076	87	144.3999939	2.119999886	9866	8.630000114	152.6000061	11.89000034	0.330000013	129	128	7.493999958	29	3.400000095	84	53	72	24	75	36.20000076	63.3333333333333	441.379310344828	441.379310344828
883	male	0	12.69999981	36.90000153	3.099999905	114	143.6000061	2.200000048	48.29999924	0.101999998	29.5	8.529999733	0.361000001	154	93.09999847	7.414000034	33	0.5	125	65	80	20	49	41.20000076	85	282.121207484849	282.121207484849
884	male	0	15.5	52	3.75999999	85	141.8999939	2.049999952	915.0999756	10.11999989	163	8.760000229	0.388000011	66	78.69999695	7.44299984	21	1.200000048	111	62	134	26	82	27.79999924	78.3333333333333	374.761890238095	374.761890238095
886	male	0	14.89999962	48	4.480000019	109	146.6999969	2.019999981	1138	74.83999634	188.8999939	8.180000305	0.388999999	188	77	7.190000057	40	3.5	124	64	169	32	71	28.60000038	84	192.5	192.5
891	female	0	13.19999981	36.90000153	4.429999828	47	143.1000061	2.039999962	232.3999939	0.759000003	80.19999695	7.059999943	0.300000012	92	129	7.403999805	80	2.900000095	132	74	86	46	65	22.79999924	93.3333333333333	161.25	161.25
892	female	0	17.89999962	51.79999924	3.940000057	53	142.5	1.950000048	1325	3.190000057	185	15.35000038	0.349000007	170	49.40000153	7.396999836	29	1.700000048	142	70	94	26	63	32.09999847	94	170.344832862069	170.344832862069
895	female	0	14.60000038	41.90000153	3.619999886	238	140.8000031	1.99000001	35000	8.989999771	311.4500122	4.829999924	0.328999996	225	89.90000153	7.447000027	33	1.299999952	165	75	106	24	84	29.5	105	272.424247060606	272.424247060606
896	male	0	16.10000038	52.20000076	3.980000019	67	140.1000061	1.960000038	2177	2.059999943	187.1000061	0.850000024	0.282000005	78	116	7.486000061	33	0.800000012	138	74	118	22	76	24.79999924	95.3333333333333	351.515151515152	351.515151515152
897	female	0	15.5	36.59999847	4.119999886	38	142	1.99000001	298.2000122	0.086000003	20.5	7.909999847	0.333000004	297	119	7.479000092	33	2.400000095	103	52	111	28	65	31.39999962	69	360.606060606061	360.606060606061
902	male	0	16.29999924	43.79999924	4.039999962	108	144.8000031	1.919999957	4493	28.95000076	214.6000061	14.55000019	0.451999992	120	75.59999847	7.343999863	41	4.699999809	144	86	122	36	87	30.89999962	105.333333333333	184.390240170732	184.390240170732
905	female	0	17.29999924	42.09999847	4.360000134	96	146.8999939	1.690000057	999.5	100	215.3999939	17.28000069	0.298999995	47	83	7.225999832	33	10.69999981	112	53	190	33	74	25.10000038	72.6666666666667	251.515151515152	251.515151515152
909	male	0	14.10000038	40.79999924	4.119999886	98	140.3000031	2.140000105	104.6999969	1.860000014	48.90000153	10.81000042	0.375999987	151	87.69999695	7.401000023	33	1.399999976	137	82	107	24	74	34.5	100.333333333333	265.757566515152	265.757566515152
910	male	0	16	49.79999924	3.75999999	206	141.6000061	1.779999971	8873	3.359999895	126.1999969	10.03999996	0.270000011	73	194	7.348999977	53	2.299999952	160	105	122	26	84	23.79999924	123.333333333333	366.037735849057	366.037735849057
911	male	0	17.10000038	46	3.99000001	337	137.6000061	1.889999986	2304	36.68999863	218.8300018	16.13999939	0.342999995	85	95.5	7.431000233	33	1.5	107	71	129	28	48	16.79999924	83	289.393939393939	289.393939393939
915	male	0	18	54.59999847	3.079999924	484	147.1999969	1.580000043	35000	100	275.2600098	14.36999989	0.229000002	30	93	7.40500021	55	3	122	61	127	34	61	23.5	81.3333333333333	169.090909090909	169.090909090909
918	male	0	18.10000038	44.40000153	3.640000105	62	135.5	1.690000057	891.5999756	55.77000046	115	7.570000172	0.294999987	20	166	7.510000229	21	2	97	63	140	26	62	22.70000076	74.3333333333333	790.47619047619	790.47619047619
922	male	0	15.19999981	39.40000153	3.470000029	69	143.1999969	2.069999933	488.1000061	18.96999931	43	5.989999771	0.294	72	142	7.584000111	33	1.600000024	100	58	84	22	84	30.10000038	72	430.30303030303	430.30303030303
932	male	0	15.89999962	55.09999847	3.339999914	114	142.8999939	2.069999933	4158	51.31999969	150.5	18.79999924	0.324999988	170	85.80000305	7.381999969	33	2.200000048	131	77	117	32	52	31.79999924	95	260.000009242424	260.000009242424
938	female	0	12.89999962	36	3.619999886	40	145.1000061	1.870000005	158.6999969	6.340000153	45.09999847	2.25	0.305999994	40	231	7.323999882	33	0.899999976	102	52	115	25	56	22.60000038	68.6666666666667	700	700
941	female	0	15.30000019	43.09999847	3.24000001	71	123.5	1.870000005	1324	92.06999969	213.7599945	7.489999771	0.312000006	59	160	7.485000134	33	1.399999976	116	61	97	22	74	23.70000076	79.3333333333333	484.848484848485	484.848484848485
954	male	0	14.80000019	40.59999847	3.859999895	53	142.1999969	1.960000038	1697	2.410000086	111.5999985	10.27000046	0.291000009	244	99.5	7.441999912	33	1.299999952	92	68	120	24	82	21.39999962	76	301.515151515152	301.515151515152
962	male	0	15.10000038	45.79999924	3.819999933	73	137.6999969	1.909999967	887.5	1.590000033	184.6699982	9.729999542	0.291000009	172	80.30000305	7.43599987	33	1.100000024	157	63	98	22	82	23.5	94.3333333333333	243.333342575758	243.333342575758
964	female	0	18.39999962	40.59999847	4.170000076	78	141.1000061	2.109999895	2158	15.43999958	142.1999969	7.119999886	0.256000012	246	86.30000305	7.396999836	33	1	112	62	102	22	56	26.60000038	78.6666666666667	261.515160757576	261.515160757576
968	female	0	15.89999962	35.5	3.900000095	300	141.1999969	1.779999971	35000	41.63999939	149.1600037	10.61999989	0.291999996	170	112	7.383999825	41	6.199999809	145	70	158	24	87	27.79999924	95	273.170731707317	273.170731707317
969	male	0	15.80000019	43.59999847	3.650000095	76	143.1000061	1.980000019	6270	100	200	19.37000084	0.365999997	100	67.69999695	7.289000034	21	3.299999952	142	92	124	35	69	32.20000076	108.666666666667	322.380937857143	322.380937857143
970	male	1	30.39999962	56.29999924	5.050000191	150	144.1000061	2.299999952	35000	23.73999977	200	15.13000011	0.393000007	136	83.19999695	7.421000004	21	4.599999905	115	58	116	37	89	25.79999924	77	396.190461666667	396.190461666667
973	male	0	15.69999981	43.79999924	4.300000191	91	136.6000061	1.899999976	225	1.450000048	183.6999969	5.570000172	0.254999995	87	89.40000153	7.350999832	37	1.899999976	115	66	107	26	84	28.79999924	82.3333333333333	241.621625756757	241.621625756757
974	male	0	13.39999962	57.5	4.650000095	82	136.3000031	1.929999948	574.9000244	2.99000001	81.86000061	12.56000042	0.43599999	221	72	7.293000221	33	1.299999952	158	96	107	26	62	30.5	116.666666666667	218.181818181818	218.181818181818
977	male	0	15.60000038	49.59999847	3.849999905	192	129.5	1.99000001	2576	100	200	7.480000019	0.27700001	58	71.40000153	7.413000107	29	1.799999952	106	58	132	30	78	23.89999962	74	246.206901827586	246.206901827586
983	male	0	13.19999981	39.40000153	4.079999924	54	141	1.940000057	75.59999847	0.072999999	27.55999947	17.76000023	0.340999991	228	101	7.480000019	33	1.899999976	122	73	99	32	75	26.39999962	89.3333333333333	306.060606060606	306.060606060606
985	male	0	14.5	47.59999847	4.289999962	95	139.6000061	1.789999962	5656	10.22999954	173.8000031	11.02000046	0.284999996	173	69.80000305	7.467000008	33	2.5	107	64	115	22	89	20.89999962	78.3333333333333	211.515160757576	211.515160757576
986	male	0	14.19999981	45.40000153	3.430000067	103	150.3000031	2.039999962	1518	0.416999996	130.8000031	9.590000153	0.261999995	202	54.79999924	7.486000061	29	1	162	108	102	22	81	19.20000076	126	188.96551462069	188.96551462069
987	male	0	15.19999981	34.70000076	4.590000153	92	138.1999969	2.039999962	108.9000015	0.041999999	63.11000061	7.809999943	0.25	120	105	7.409999847	21	1.799999952	104	65	85	21	69	29.60000038	78	500	500
988	male	0	15.39999962	47.79999924	3.380000114	88	144.6000061	1.899999976	1283	0.598999977	200	18.84000015	0.393999994	123	69.90000153	7.455999851	33	2.099999905	100	58	151	28	81	26.20000076	72	211.818186454545	211.818186454545
992	male	0	15.19999981	46.79999924	3.349999905	87	140.5	1.860000014	1766	4.880000114	52.59999847	9.039999962	0.39199999	429	77.80000305	7.453000069	33	1.399999976	163	99	107	26	81	26.5	120.333333333333	235.757585	235.757585
993	female	1	13.69999981	51.40000153	5.710000038	214	133.1000061	2.059999943	2777	76.94000244	110.5400009	11.59000015	0.316000015	179	133	7.443999767	29	2.299999952	166	64	156	38	82	27.1	98	458.620689655172	458.620689655172
996	male	0	17.70000076	56.40000153	5.150000095	372	135.5	1.940000057	2545	26.09000015	169.1000061	12.5	0.328000009	184	116	7.241000175	65	2.599999905	133	89	114	30	70	27.70000076	103.666666666667	178.461538461538	178.461538461538
997	male	0	17	56.5	4.190000057	253	142.6999969	1.809999943	9318	12.34000015	245.9700012	12.22000027	0.254999995	176	67	7.34100008	33	5.699999809	107	74	199	34	70	25.39999962	85	203.030303030303	203.030303030303
999	female	0	15.10000038	46.59999847	3.900000095	663	130.8999939	1.940000057	7524	100	264.0100098	13.43000031	0.234999999	88	143	7.440999985	33	4.199999809	139	85	120	28	56	24.70000076	103	433.333333333333	433.333333333333
1001	female	0	14.60000038	51.29999924	3.809999943	90	135.5	1.940000057	30901	19.77000046	200	8.770000458	0.252000004	46	120	7.427000046	33	0.899999976	115	48	124	22	72	23.89999962	70.3333333333333	363.636363636364	363.636363636364
1004	male	0	18.60000038	63.90000153	4.400000095	141	136.8000031	1.960000038	26364	100	328	9.399999619	0.239999995	42	147	7.188000202	40	4.099999905	124	65	143	43	61	18.60000038	84.6666666666667	367.5	367.5
1005	female	0	13.30000019	49.70000076	3.960000038	93	141.6000061	1.799999952	1669	19.69000053	199.3999939	10.05000019	0.250999987	130	99.5	7.399000168	21	1.399999976	119	66	106	24	71	26.79999924	83.6666666666667	473.809523809524	473.809523809524
1006	female	1	16.29999924	31.29999924	5.300000191	129	136.8999939	2.220000029	9179	20	93.83999634	32.5	0.340000004	468	100	7.464000225	33	8.5	103	50	190	45	87	21.79999924	67.6666666666667	303.030303030303	303.030303030303
1008	male	1	15.30000019	47.70000076	3.84	34	137.9	2.44	10539	100	200	1.110000014	0.263000011	20	50	7.02699995	100	4.400000095	46	29	148	35	73	43.8	34.6666666666667	50	50
1012	male	0	13.5	54.09999847	3.950000048	76	137.3000031	1.909999967	678.4000244	1.149999976	116	6.960000038	0.282999992	293	103	7.464000225	33	1.200000048	104	50	104	24	79	21	68	312.121212121212	312.121212121212
1015	female	0	18.89999962	57.40000153	3.859999895	69	145.3999939	2.019999981	21780	32.81000137	152.8999939	17.03000069	0.25	29	150	7.343999863	33	6.5	135	78	124	28	95	25.70000076	97	454.545454545455	454.545454545455
1025	male	0	13.80000019	56.70000076	3.99000001	175	142.5	1.799999952	6831	15.96	200	6.130000114	0.335999995	56	112	7.448999882	21	2	112	62	88	20	70	35	78.6666666666667	533.333333333333	533.333333333333
1029	male	0	15.5	38.59999847	3.529999971	59	136.3000031	1.879999995	304.7000122	62.36999893	187.1799927	9.670000076	0.338	124	108	7.415999889	33	5.800000191	127	99	152	26	59	23.39999962	108.333333333333	327.272727272727	327.272727272727
1032	female	0	15.80000019	41.29999924	3.829999924	105	142.1000061	2.150000095	392.3999939	59.29000092	140.8000031	20.39999962	0.321999997	145	105	7.368999958	33	2.299999952	112	59	134	22	76	32.59999847	76.6666666666667	318.181818181818	318.181818181818
1037	male	0	20.29999924	60.29999924	5.25	91	141.1999969	1.600000024	3329	100	150.1199951	31.12000084	0.191	75	91	7.368999958	33	7	109	52	151	40	80	30.20000076	71	275.757575757576	275.757575757576
1043	female	0	17.20000076	47.29999924	3.50999999	185	143	1.789999962	35000	76.48000336	226.7200012	5.25	0.261000007	36	102	7.447999954	33	1.5	159	70	92	22	92	23.39999962	99.6666666666667	309.090909090909	309.090909090909
1045	female	0	18.60000038	45.59999847	4.320000172	239	146.6000061	1.940000057	5127	32.43000031	200	4.789999962	0.209999993	223	187	7.486000061	50	6.900000095	137	46	143	28	84	21.39999962	76.3333333333333	374	374
1047	male	0	15.10000038	42.29999924	3.950000048	152	143.6999969	2.150000095	629.9000244	1.25999999	200	9.510000229	0.372000009	244	62.59999847	7.460000038	33	1.100000024	85	47	126	250	87	24.89999962	59.6666666666667	189.696965060606	189.696965060606
1051	female	0	15.89999962	46.20000076	3.519999981	60	136.3000031	2.109999895	2472	4.050000191	68.19999695	3.549999952	0.317999989	72	82.40000153	7.407999992	21	1.299999952	131	76	150	26	86	27.89999962	94.3333333333333	392.380959666667	392.380959666667
1053	female	0	22.70000076	52.09999847	3.869999886	344	141.8999939	1.690000057	26164	100	262.3999939	13.97000027	0.308999985	38	83.80000305	7.321000099	33	3.700000048	130	96	112	28	64	23.60000038	107.333333333333	253.939403181818	253.939403181818
1056	male	0	14.5	44.20000076	3.75	199	135.6000061	1.889999986	5143	14.31999969	114.4700012	7.829999924	0.289000005	189	139	7.446000099	33	1.299999952	136	75	95	27	77	22.20000076	95.3333333333333	421.212121212121	421.212121212121
1057	male	0	16	48.79999924	3.910000086	139	137.3000031	1.75999999	2315	66.09999847	172.8999939	4.050000191	0.305999994	119	92.5	7.412000179	37	2.599999905	107	75	129	28	54	29.5	85.6666666666667	250	250
1059	male	0	14.10000038	42.09999847	3.74000001	87	140.8000031	2.039999962	115.9000015	0.630999982	184.3000031	5.699999809	0.349000007	102	71.5	7.390999794	29	1.200000048	101	65	106	36	70	31.70000076	77	246.551724137931	246.551724137931
1069	female	0	16	47	4.78000021	167	141.3000031	2.220000029	6419	24.22999954	174.6000061	10.72999954	0.344000012	117	135	7.362999916	21	1.200000048	108	53	164	97	88	31.60000038	71.3333333333333	642.857142857143	642.857142857143
1073	male	0	16.5	45.40000153	3.950000048	214	143.1000061	1.929999948	3229	100	139.6000061	35.66999817	0.340999991	51	105	7.433000088	21	4.699999809	103	55	118	35	74	29.89999962	71	500	500
1074	male	0	15.19999981	38.79999924	3.74000001	138	146.8999939	2.029999971	19609	0.47299999	133.3999939	22.56999969	0.381000012	228	58.90000153	7.211999893	29	4.099999905	132	54	142	46	82	27.5	80	203.103453551724	203.103453551724
1075	male	0	13.69999981	38.90000153	3.410000086	52	138.1999969	2.24000001	55	0.037	29.65999985	14.28999996	0.389999986	204	100	7.4	21	1	143	78	89	20	58	41.29999924	99.6666666666667	476.190476190476	476.190476190476
1077	male	0	14.39999962	49.79999924	4.050000191	103	141.5	2.059999943	2465	10.90999985	58.41999817	13.47999954	0.356999993	103	80.19999695	7.399000168	21	1.399999976	99	71	101	24	85	35.59999847	80.3333333333333	381.904747380952	381.904747380952
1078	female	0	16.20000076	50.20000076	3.569999933	200	141	1.860000014	7133	10.56999969	200	14.32999992	0.312000006	189	107	7.370999813	33	6.5	122	75	116	30	76	30.79999924	90.6666666666667	324.242424242424	324.242424242424
1079	male	0	15.39999962	41.79999924	3.140000105	104	145	1.850000024	972.2000122	26.95000076	47.20000076	5.940000057	0.321999997	112	96.69999695	7.40899992	21	1.799999952	123	54	111	24	83	28.20000076	77	460.476175952381	460.476175952381
1081	female	0	14.80000019	32.09999847	4.079999924	75	143.3000031	1.929999948	1716	0.068999998	28.5	10.02000046	0.321999997	137	75.30000305	7.454999924	29	2.900000095	94	47	92	30	88	24.70000076	62.6666666666667	259.655182931035	259.655182931035
1082	male	0	15	56.20000076	3.910000086	251	131.8000031	1.830000043	3952	46.20999908	231.8999939	12.65999985	0.363999993	137	85.09999847	7.396999836	29	2.200000048	112	67	113	22	73	27	82	293.448270586207	293.448270586207
1084	female	0	16.60000038	43.20000076	3.630000114	430	155.1000061	1.710000038	16580	100	284.25	25.02000046	0.284999996	33	101	7.30700016	37	5.199999809	113	51	112	28	68	23.89999962	71.6666666666667	272.972972972973	272.972972972973
1088	male	0	16.79999924	38.90000153	4.019999981	64	137.6999969	1.889999986	984.2999878	36.18000031	200	14.72000027	0.326999992	259	130	7.412000179	33	2.299999952	122	83	106	24	63	25.5	96	393.939393939394	393.939393939394
1089	female	0	15.39999962	33.20000076	3.970000029	60	140.1000061	1.610000014	993.9000244	8.119999886	200	10.42000008	0.333000004	238	122	7.329999924	41	2.200000048	115	85	122	28	46	26	95	297.560975609756	297.560975609756
1091	male	0	22.20000076	45.79999924	3.349999905	131	139.8000031	1.860000014	22658	22.25	200	8.25	0.388000011	86	66.19999695	7.326000214	37	5.199999809	134	91	126	34	89	35.40000153	105.333333333333	178.918910675676	178.918910675676
1092	male	1	15.69999981	48.59999847	2.839999914	62	140	2.339999914	15222	3.180000067	154.2100067	18.38999939	0.27700001	195	123	7.421000004	30	1.899999976	126	81	132	31	69	26.5	96	410	410
1093	male	0	14.89999962	42.29999924	3.619999886	60	141.3000031	1.889999986	427.2999878	3.150000095	139.1999969	9.390000343	0.347000003	126	97.19999695	7.440999985	33	1	121	60	82	22	83	26.79999924	80.3333333333333	294.54544530303	294.54544530303
1094	male	0	15.80000019	47.29999924	4.170000076	182	140.1000061	2.019999981	2865	8.930000305	189.3300018	6.5	0.257999986	142	99.69999695	7.423999786	21	0.800000012	126	61	98	29	88	30.29999924	82.6666666666667	474.761890238095	474.761890238095
1108	female	0	12.5	35	3.829999924	55	135.8000031	1.950000048	55	0.125	83.79000092	8.449999809	0.266000003	137	80.19999695	7.46600008	33	2.700000048	145	83	135	22	75	40	103.666666666667	243.030293787879	243.030293787879
1112	male	0	26.29999924	74.30000305	3.829999924	95	137	1.75	10778	15.21000004	167.6000061	18.95999908	0.264999986	183	108	7.418000221	33	1	114	74	122	22	70	30	87.3333333333333	327.272727272727	327.272727272727
1113	male	1	15	40.29999924	3.700000048	111	131.1000061	2.130000114	4446	1.460000038	200	19.70000076	0.402999997	311	70	7.412000179	33	2.5	90	63	121	36	76	25	72	212.121212121212	212.121212121212
1120	male	0	15.19999981	46.20000076	3.450000048	184	139.8000031	1.960000038	1845	84.09999847	169.6000061	8.409999847	0.237000003	154	95.69999695	7.396999836	21	2.400000095	126	72	96	20	62	27.5	90	455.714271190476	455.714271190476
1126	female	0	18.20000076	51.40000153	3.50999999	144	144.8999939	1.940000057	17382	100	200	31.88999939	0.298999995	121	118	7.263999939	41	10.30000019	164	56	83	40	74	33.5	92	287.80487804878	287.80487804878
1131	female	0	15.10000038	54.40000153	4.980000019	184	140.1999969	2	20551	100	120.9000015	10.25	0.280999988	101	87.59999847	7.392000198	37	3.400000095	110	61	116	24	84	31.20000076	77.3333333333333	236.756752621622	236.756752621622
1141	male	0	15.60000038	45.09999847	3.99000001	154	139.5	2.019999981	2183	60.61000061	172.3999939	23.97999954	0.36500001	140	63.5	7.43900013	21	2.200000048	106	53	138	24	78	31.5	70.6666666666667	302.380952380952	302.380952380952
1143	male	0	14.89999962	44	4.389999866	87	134.6000061	1.929999948	7011	1.49000001	172.8999939	5.329999924	0.230000004	128	80.80000305	7.403999805	33	1.700000048	142	83	122	22	70	24.79999924	102.666666666667	244.848494090909	244.848494090909
1145	male	0	15.19999981	56.09999847	3.039999962	84	149.1000061	1.950000048	390.8999939	2.200000048	300	8.659999847	0.328999996	133	104	7.454999924	21	1.399999976	163	85	95	20	86	20.10000038	111	495.238095238095	495.238095238095
1147	male	0	15.10000038	42.79999924	4.980000019	68	143.3999939	1.879999995	103.5999985	0.250999987	31.96999931	7.599999905	0.293000013	270	140	7.447999954	35	2.200000048	148	89	122	22	55	23.79999924	108.666666666667	400	400
1150	female	0	13.69999981	43.70000076	3.329999924	68	141.6999969	2.190000057	580.5	2.609999895	200	13.11999989	0.333000004	182	88.59999847	7.472000122	33	0.899999976	116	58	118	24	69	24.89999962	77.3333333333333	268.484843848485	268.484843848485
1152	female	0	16.79999924	66.19999695	2.630000114	80	140.3999939	2.079999924	450	42.83000183	241.1000061	14.02000046	0.340999991	236	102	7.340000153	21	1	122	56	135	30	53	22.29999924	78	485.714285714286	485.714285714286
1153	male	1	21	55	3.670000076	81	126.5	1.679999948	8880	2.130000114	142.1000061	3.039999962	0.416000009	124	68.69999695	7.320000076	45	10.80000001	90	57	164	30	24	26.79999924	68	152.666659888889	152.666659888889
1154	male	1	19.29999924	52.90000153	3.029999971	238	143.6999969	2.069999933	16725	68.06999969	200	8.960000038	0.301999986	28	89.19999695	7.078000069	61	13.69999981	45	20	139	38	83	25	28.3333333333333	146.229503196721	146.229503196721
1156	female	0	21.70000076	94.5	4.75	147	144.1999969	1.539999962	2903	100	194.1000061	10.53999996	0.328999996	17	72	7.229000092	50	3.599999905	114	73	154	46	66	21.60000038	86.6666666666667	144	144
1160	male	0	13.60000038	42	4.670000076	90	143	2.130000114	746	31.63999939	200	9.300000191	0.231999993	338	149	7.423999786	21	1.5	133	75	108	22	86	30.70000076	94.3333333333333	709.52380952381	709.52380952381
1165	female	0	13.19999981	34.09999847	4.050000191	63	141.1999969	2.170000076	368.1000061	0.090000004	85.90000153	4.210000038	0.405000001	89	125	7.46600008	21	1.200000048	142	82	126	95	86	34.90000153	102	595.238095238095	595.238095238095
1168	female	1	17.70000076	54.5	3.920000076	245	148.5	1.820000052	35000	5.01	29.62000084	6.579999924	0.287999988	78	91.90000153	7.184999943	90	3	139	82	159	183	65	26.29999924	101	102.111112811111	102.111112811111
1175	male	0	20	53.40000153	5.489999771	216	142.8000031	1.889999986	4364	100	145.8399963	78.30000305	0.261000007	103	72.80000305	7.375999928	33	6.199999809	94	60	150	30	70	23.29999924	71.3333333333333	220.606069848485	220.606069848485
1177	female	0	16.70000076	46.70000076	4.369999886	90	141	2.140000105	3464	52.86999893	58.83000183	7.239999771	0.307000011	99	112	7.381000042	29	1.100000024	137	72	84	25	93	34.59999847	93.6666666666667	386.206896551724	386.206896551724
1186	female	0	15.39999962	41.40000153	3.690000057	50	134.6000061	1.919999957	255	9.460000038	235.1999969	8.010000229	0.324000001	193	92.69999695	7.403999805	21	1.700000048	110	62	110	20	33	30.5	78	441.428556904762	441.428556904762
1195	male	0	15.30000019	60.29999924	5.019999981	183	136.8000031	2.220000029	3916	2.670000076	71.98999786	17.34000015	0.314999998	206	148	7.433000088	33	1.600000024	97	78	118	29	62	31.29999924	84.3333333333333	448.484848484848	448.484848484848
1197	male	0	15.5	55.20000076	3.75999999	170	142	1.840000033	3821	100	202.8999939	25.39999962	0.421000004	59	122	7.394999981	33	2.700000048	95	70	154	24	71	31.89999962	78.3333333333333	369.69696969697	369.69696969697
1198	male	1	12.2	31.3	5.760000229	319	129.1000061	2.630000114	14520	77.83999634	200	7.35	0.403	109	123	7.297999859	60	7.300000191	90	60	156	44	48	20	70	205	205
1200	male	0	14.10000038	35.5	3.910000086	51	141.1999969	2.309999943	80	0.012	20.29999924	8.010000229	0.409999996	177	66.40000153	7.448999882	41	1.700000048	124	73	96	22	44	40	90	161.951223243902	161.951223243902
1203	female	0	16.79999924	45.59999847	3.670000076	56	141.8000031	2.029999971	87	2.160000086	183.1999969	17.97999954	0.384000003	182	75.09999847	7.413000107	33	1.600000024	132	63	110	26	86	28.29999924	86	227.575752939394	227.575752939394
